# Supplementary material for: Peer review of the pesticide risk assessment of the active substance Mild Pepino mosaic virus isolate VX1
Source: PubMed Central journal article supplement (PMC7009858; doi:10.2903/j.efsa.2017.4650), 2017-01-23
Supplement: EFS2-15-e04650-s001.pdf [file EFS2-15-e04650-s001.pdf]

Appendix to:

EFSA (European Food Safety Authority), 2016. Conclusion on the peer review of the pesticide risk assessment of the active substance Mild Pepino mosaic virus isolate VX1. EFSA Journal 2016;14(14):4650, 16 pp. doi:10.2903/j.efsa.2016.4650

© European Food Safety Authority, 2016

## Appendix A – List of end points for the active substance and the representative formulation

### Chapter 1 Identity, Biological properties, Details of Uses, Further information

|                                  |                                                        |
|----------------------------------|--------------------------------------------------------|
| Active micro-organism            | Mild Pepino mosaic virus isolate VX 1                  |
| Function (e.g. control of fungi) | Elicitor (Control of aggressive Pepino mosaic viruses) |

#### Identity of the micro-organism (Annex IIM 1)

|                                                                                                                 |                                                                                           |
|-----------------------------------------------------------------------------------------------------------------|-------------------------------------------------------------------------------------------|
| Name of the organism                                                                                            | <i>Pepino mosaic virus</i>                                                                |
| Taxonomy                                                                                                        | Potex viruses                                                                             |
| Species, subspecies, strain:                                                                                    | Genus: <i>Potexvirus</i><br>Family: <i>Alphaflexiviridae</i><br>Order: <i>Tymovirales</i> |
| Identification                                                                                                  | ELISA<br>qRT-PCR<br>bioassay (infectivity on tomato)                                      |
| Culture collection                                                                                              | German Collection of Micro-organisms and Cell Cultures (DSMZ)<br>Reference no. DSM 26974. |
| Minimum and maximum concentration of the MPCA used for manufacturing of the formulated product (cfu; g/kg):     | 10-50 mg/L<br>1.5x10 <sup>11</sup> to 7.5x10 <sup>11</sup> virus particles/mL             |
| Identity and content of relevant impurities, additives, contaminating organisms in the technical grade of MPCA: | Nicotine < 0.1 mg/L                                                                       |
| Is the MCPA genetically modified; if so provide type of modification:                                           | no                                                                                        |

## Biological properties of the micro-organism (Annex IIM 2)

|                                                                            |                                                                                                                                                                                                                                                                                                                                                                                                                                                                                                        |
|----------------------------------------------------------------------------|--------------------------------------------------------------------------------------------------------------------------------------------------------------------------------------------------------------------------------------------------------------------------------------------------------------------------------------------------------------------------------------------------------------------------------------------------------------------------------------------------------|
| Origin and natural occurrence                                              | <p><i>Pepino mosaic virus</i> is first reported in Peru but probably present world-wide.</p> <p>Mild Pepino mosaic virus VX 1 is a mild variant of the Peruvian (LP) strain.</p> <p>Mild Pepino mosaic virus VX 1 has been isolated from a tomato plant in a greenhouse in the Westland (NL) in 2004.</p> <p>Background levels are unknown but the virus is present and replicates efficiently on <i>Solanaceae</i> and can survive for short times on plants of other botanical families as well.</p> |
| Target organism(s)                                                         | <i>Pepino mosaic virus</i> targets, <i>Solanum lycopersicum</i> (tomato), <i>Solanum muricatum</i> (pepino). The isolate VX1, prevents infection with virulent strains.                                                                                                                                                                                                                                                                                                                                |
| Mode of action                                                             | Mild <i>Pepino mosaic virus</i> induces plant resistance, most likely through induction of a RNA silencing process which destroys RNAs of all closely related <i>Pepino mosaic virus</i> strains                                                                                                                                                                                                                                                                                                       |
| Host specificity                                                           | Besides the target hosts tomato and pepino the <i>Pepino mosaic virus</i> can survive for short times on plants of other botanical families as well.                                                                                                                                                                                                                                                                                                                                                   |
| Life cycle                                                                 | <i>Pepino mosaic virus</i> propagates on viable host tissue. After transmission the virus enters tissue through (damaged) epidermis. Viral single stranded RNA is copied and integrated in host genome. The proposed mode of action is that host cells synthesise small interfering RNA which are incorporated in a RNA-induced silencing complex. This complex destroys RNA of invading (closely related variants of) <i>Pepino mosaic virus</i> .                                                    |
| Infectivity, dispersal and colonisation ability                            | <i>Pepino mosaic virus</i> is highly infective for plants belonging to the <i>Solanaceae</i> . <i>Pepino mosaic virus</i> might survive or replicate also on plants of other botanical families but without causing adverse effects.                                                                                                                                                                                                                                                                   |
| Relationships to known plant, animal or human pathogens                    | None. Potex viruses are plant viruses not known to interfere with animal or human systems.                                                                                                                                                                                                                                                                                                                                                                                                             |
| Genetic stability                                                          | As with all RNA viruses genetic mutation may occur.                                                                                                                                                                                                                                                                                                                                                                                                                                                    |
| Production of relevant metabolites/toxins                                  | Risk management procedures are in place to prevent the occurrence of virulent strains in the end product.<br>Viruses do not produce metabolites.                                                                                                                                                                                                                                                                                                                                                       |
| Resistance/sensitivity to antibiotics used in human or veterinary medicine | Not relevant for plant viruses.                                                                                                                                                                                                                                                                                                                                                                                                                                                                        |

## Summary of intended uses

|                                                                            |                                                                                                                  |                                                                                                                        |
|----------------------------------------------------------------------------|------------------------------------------------------------------------------------------------------------------|------------------------------------------------------------------------------------------------------------------------|
| <b>PPP (product name/code)</b><br>active substance 1<br>active substance 2 | <b>V10</b><br>Mild PepMV isolate VC1<br>Mild PepMV isolate VX1                                                   | <b>Formulation:</b><br><b>Type:</b><br><b>SC</b><br><b>Conc. of as 1:</b> 5-25 mg/L<br><b>Conc. of as 2:</b> 5-25 mg/L |
| <b>Zone(s):</b> EU                                                         | <b>professional use</b> <input checked="" type="checkbox"/> <b>non professional use</b> <input type="checkbox"/> |                                                                                                                        |

| 1           | 2                  | 3                                                                              | 4                 | 5                                                                                                                          | 6                                   | 7                                                                            | 8                                                                                                 | 10                                                                                             | 11                                                                                                                                                    | 12                          | 13            | 14                                                                                                                                             |
|-------------|--------------------|--------------------------------------------------------------------------------|-------------------|----------------------------------------------------------------------------------------------------------------------------|-------------------------------------|------------------------------------------------------------------------------|---------------------------------------------------------------------------------------------------|------------------------------------------------------------------------------------------------|-------------------------------------------------------------------------------------------------------------------------------------------------------|-----------------------------|---------------|------------------------------------------------------------------------------------------------------------------------------------------------|
| Use-<br>No. | Member<br>state(s) | Crop and/<br>or situation<br><br>(crop<br>destination /<br>purpose of<br>crop) | F<br>G<br>or<br>I | Pests or Group<br>of pests<br>controlled<br><br>(additionally:<br>developmental<br>stages of the<br>pest or pest<br>group) | Application                         |                                                                              |                                                                                                   | Application rate                                                                               |                                                                                                                                                       |                             | PHI<br>(days) | Remarks:<br><br>e.g. g<br>safener/synergist per<br>ha                                                                                          |
|             |                    |                                                                                |                   |                                                                                                                            | Method /<br>Kind                    | Timing /<br>Growth<br>stage of<br>crop &<br>season                           | Max. number<br>(min. interval<br>between<br>applications)<br>a) per use<br>b) per crop/<br>season | kg, L product /<br>ha<br>a) max. rate<br>per appl.<br>b) max. total<br>rate per<br>crop/season | g, kg a.s./ha<br>a) max. rate per<br>appl.<br>b) max. total<br>rate per<br>crop/season                                                                | Water L/ha<br><br>min / max |               |                                                                                                                                                |
| 1           | All                | <i>Solanum lycopersicum</i><br>(tomato)                                        | G                 | <i>Pepino mosaic virus</i>                                                                                                 | Downward<br>Spraying<br>(12-15 bar) | Young<br>tomato<br>plants<br>(BBCH<br>13-51,<br>10-30 cm<br>high)<br>Jan-Dec | a) 1 per crop<br>cycle<br><br>b)* 8 per 12<br>months (8<br>crop cycles per<br>year)               | a) 70 L<br>product / ha<br>per appl.<br><br>b) 560 L<br>product / ha<br>per season             | a) 1.75 g<br>a.s.1/ha per<br>application<br>1.75 g a.s.2/ha<br>per crop cycle<br>b) 14 g a.s.1/ha<br>per season<br>14 g a.s.2/ha<br>per season        | 3500 L/ha per<br>appl.      | -             | 1-8 crop cycles per 12<br>months<br><br>V10 is applied in<br>combination with 800<br>grams of<br>carborundum per 100<br>litres of spray liquid |
| 2           | All                | <i>Solanum lycopersicum</i><br>(tomato)                                        | G                 | <i>Pepino mosaic virus</i>                                                                                                 | Rubbing<br>individual<br>plants     | Young<br>tomato<br>plants<br>(BBCH<br>13-61)<br>Jan-Dec                      | a) 1 per crop<br>cycle<br><br>b)* 8 per 12<br>months (8<br>crop cycles per<br>year)               | a) 0.8 L<br>product / ha<br>per appl.<br><br>b) 6.4 L<br>product / ha<br>per 12 months         | a) 0.02 g<br>a.s.1/ha per<br>application<br>0.02 g a.s.2/ha<br>per crop cycle<br>b) 0.16 g<br>a.s.1/ha per<br>season<br>0.16 g a.s.2/ha<br>per season | 8 L/ha per appl.            | -             | 1-8 crop cycles per 12<br>months<br>V10 is applied in<br>combination with 15<br>grams of<br>carborundum per 1<br>litre of liquid               |

\*V10 is applied once per tomato plant. The product can be applied at tomato plant propagation or after transplant to tomato production greenhouses, as long as the application takes place before BBCH 51. Plant propagation companies can have up to 8 productions per 12 months. Tomato producing companies have 1-3 crops per year.

## Further information

Proposal for classification and labelling

'Micro-organisms may have the potential to provoke sensitising reactions'

P280c Wear protective gloves and protective clothing.

## Chapter 2 Analytical Methods

### Analytical methods for the micro-organism (Annex IIM 4.2.8; 4.3; IIIM 5.3)

|                                                                                             |                                                                                                                          |
|---------------------------------------------------------------------------------------------|--------------------------------------------------------------------------------------------------------------------------|
| Manufactured micro-organism (principle of method)                                           | DAS-ELISA;<br>qRT-PCR;                                                                                                   |
| Impurities and contaminating micro-organisms in manufactured material (principle of method) | Nicotine: GC-MS (validation report due in September 2016)<br>Additives: IC<br>Contaminating micro-organisms: ISO methods |
| Plant protection product (principle of method)                                              | DAS-ELISA;<br>qRT-PCR;                                                                                                   |

### Analytical methods for residues (viable and non-viable) in exposed compartments and organisms (Annex IIM 4.5 )

|                                                      |                                 |
|------------------------------------------------------|---------------------------------|
| of the active micro-organism (principle of method)   | Not necessary.                  |
| of relevant metabolites/toxins (principle of method) | Not necessary (no metabolites). |

## Chapter 3 Effects on Human Health

### Effects on human health (Annex IIM 5; IIIM 7)

|                                                                                      |                                                                                                                                                                                                                                                                                                                                           |
|--------------------------------------------------------------------------------------|-------------------------------------------------------------------------------------------------------------------------------------------------------------------------------------------------------------------------------------------------------------------------------------------------------------------------------------------|
| Medical data and direct observation, e.g. clinical cases<br>(Annex IIM 5.2)          | No known reports of adverse effects.                                                                                                                                                                                                                                                                                                      |
| Medical surveillance on manufacturing plant personnel                                | No known reports of adverse effects.                                                                                                                                                                                                                                                                                                      |
| Sensitisation/allergenicity observations, if appropriate                             | No reports of allergenic observations. Based on common knowledge on micro-organisms repeated exposure may lead to provocation of sensitising reactions.                                                                                                                                                                                   |
| Acute toxicity, pathogenicity and infectiveness                                      |                                                                                                                                                                                                                                                                                                                                           |
| Acute oral toxicity, pathogenicity and infectiveness                                 | LD50, oral > 2000 mg/kg bw                                                                                                                                                                                                                                                                                                                |
| Acute inhalation toxicity, pathogenicity and infectiveness                           | LD50, inhalation >5.04 mg/L                                                                                                                                                                                                                                                                                                               |
| Acute dermal toxicity:                                                               | LD50, dermal > 2000 mg/kg bw                                                                                                                                                                                                                                                                                                              |
| Intraperitoneal/subcutaneous single dose                                             | In a literature study it was found that after intravenous application in mice plant virus particles were found in a wide variety of tissues, but no adverse effects were seen and a rapid clearance from the body was observed.                                                                                                           |
| Genotoxicity<br>(Annex IIM 5.3.5)                                                    | Not genotoxic in Ames test with and without metabolic activation with S9.                                                                                                                                                                                                                                                                 |
| Cell culture studies (Annex IIM, point 5.3.6)                                        | No data (not necessary).                                                                                                                                                                                                                                                                                                                  |
| Information on short term toxicity and pathogenicity (Annex IIM, point 5.3.7)        | No data (not necessary).                                                                                                                                                                                                                                                                                                                  |
| First aid measures, medical treatment<br>(Annex IIM, point 5.2.5)                    | AFTER INHALATION: In case of respiratory problems, provide victim with fresh air and place in resting position that facilitates breathing. In case of respiratory symptoms: Contact an ANTI-POISON CENTRE or a doctor.<br><br>AFTER SKIN CONTACT: wash with abundant water and soap. In case of skin irritation or rash: Contact a doctor |
| Specific toxicity, pathogenicity and infectiveness studies<br>(Annex IIM, point 5.5) | <i>In vitro</i> skin corrosion: non-corrosive                                                                                                                                                                                                                                                                                             |

### Reference values

ADI, ARfD and AOEL

Not needed for *Mild Pepino Mosaic virus*

**Exposure scenarios**

Operators

Pepino mosaic virus:  
No AOEL set for the TGAI. Operators wear standard respiratory and dermal protection. No further operator assessment is necessary for Pepino Mosaic Virus isolate VX1.

Nicotine:  
Spray application: No unacceptable risk.

Rubbing on individual plants: No unacceptable risk when using appropriate protective equipment (gloves).

Workers

No AOEL set for the TGAI. No further operator assessment is necessary for Pepino Mosaic Virus isolate VX1.

Nicotine  
No unacceptable risk for the unprotected worker.

Bystanders and residents

Not relevant (greenhouse use only).

## Chapter 4 Residues

### Residues in or on treated products, food and feed (Annex IIM 6; IIIM 8)

Viable residues

Considering all the available information, it would not be necessary to derive reference values for Mild Pepino Mosaic virus isolate VX1, and therefore consumer exposure calculations are not necessary.

No MRL is required for Mild Pepino Mosaic virus isolate VX1.

Non-viable residues

Residues of nicotine in tomato are expected to be below the default MRL of 0.01 mg/kg.

The assessment shows that the exposure to the impurity nicotine is well below the ADI and ARfD. A risk assessment considering exposure to nicotine from other dietary sources was not conducted in the remit of the peer review.



## Chapter 5 Fate and Behaviour in the Environment (Annex IIM 7; IIIM 9)

|                                         |                                                                                                                                                                                                                                                                                                                                                                                                                                                                                |
|-----------------------------------------|--------------------------------------------------------------------------------------------------------------------------------------------------------------------------------------------------------------------------------------------------------------------------------------------------------------------------------------------------------------------------------------------------------------------------------------------------------------------------------|
| Persistence and multiplication in soil  | <p><i>Pepino mosaic virus</i> can only reproduce inside its host. Multiplication in soil is not relevant. Persistence in soil has not been quantified.</p> <p>Nicotine:<br/>The concentration of nicotine in the product is <math>\leq 0.1</math> mg/L. This value is used for the risk assessment.<br/>DT<sub>50</sub>: 0.5, 1 day (n=2) (30 days used in risk assessment according to ECHA (2014))<br/>PIEC<sub>max,soil</sub>: 0.007 <math>\mu\text{g}/\text{kg}</math></p> |
| Persistence and multiplication in water | <p><i>Pepino mosaic virus</i> can only reproduce inside its host. Multiplication in water is not relevant. Persistence in nutrient solution up to 3 weeks (20°C)</p> <p>Nicotine:<br/>DT50 water: 15 days can be used in risk assessment according to ECHA (2015)<br/>Ready biodegradable: yes (OECD301B)<br/>PIEC<sub>max,water</sub>: <math>1.9 \times 10^{-11}</math> g/L (18.6 pg/L)</p>                                                                                   |
| Persistence and multiplication in air   | <p>DT<sub>50</sub>: 1.4 hours (AOPWIN v1.92) 12h irradiation per day and <math>1.5 \cdot 10^6</math> OH<math>\cdot</math>/cm<sup>3</sup></p>                                                                                                                                                                                                                                                                                                                                   |
| Mobility                                | <p>It is unlikely that <i>Pepino mosaic virus</i> will be mobile in the environment via soil, or air.</p> <p>Nicotine:<br/>Koc: estimated 48.23 L/kg (from logKow)</p>                                                                                                                                                                                                                                                                                                         |

## Chapter 6 Effects on Non-target Species (Annex IIM 8; IIIM 10)

|                                            |                                                                                                                                                                                                                                                                                                                                                                                                                                                                                                                                                                                                           |
|--------------------------------------------|-----------------------------------------------------------------------------------------------------------------------------------------------------------------------------------------------------------------------------------------------------------------------------------------------------------------------------------------------------------------------------------------------------------------------------------------------------------------------------------------------------------------------------------------------------------------------------------------------------------|
| Effects on birds                           | <p>Plant pathogenic viruses are generally considered to be pathogenic towards plant species only and not towards other organisms. Limited exposure for glasshouse use.</p> <p>Nicotine: Limited exposure for glasshouse use.</p>                                                                                                                                                                                                                                                                                                                                                                          |
| Effect on aquatic organisms                | <p>Plant pathogenic viruses are generally considered to be pathogenic towards plant species only and not towards other organisms.</p> <p>Nicotine – data from the public literature:<br/> <i>Nandus nandus</i> 168 h EC50: 2.21 mg/L<br/> <i>Daphnia pulex</i> 48h EC50 0.24 mg/L<br/> <i>Selenastrum capricornutum</i> 96h E<sub>b</sub>C50 115 mg/L<br/> E<sub>r</sub>C50 72.9 mg/L</p> <p>TER-values using PEC<sub>sw</sub> of 1.9x10<sup>-11</sup> g nicotine/L<br/> TER for fish: &gt;1x10<sup>8</sup><br/> TER for invertebrates: &gt;1x10<sup>7</sup><br/> TER for algae: &gt;1x10<sup>9</sup></p> |
| Effect on plants other than algae          | <p>The host range of <i>Pepino mosaic virus</i> is mainly restricted to plant species of the Solanaceae family</p> <p>cotinine (metabolite of nicotine)<br/> <i>Lemna gibba</i> 7d EC50 &gt;1000µg/L</p>                                                                                                                                                                                                                                                                                                                                                                                                  |
| Effects on bees and other arthropods       | <p>Plant pathogenic viruses are generally considered to be pathogenic towards plant species only and not towards other organisms. Bumblebees can transmit mechanically. Any adverse effects on bumblebees are not reported.</p> <p>Nicotine:<br/> Bees: reduced larval survival 5 µg/g diet<br/> NTA: adverse effects 0.1 mg/kg diet<br/> Estimated exposure rates are 0.0012 mg/tomato plant. Naturally occurring nicotine concentrations in tomatoes: 0.01 mg/kg fruits and in flowers of <i>Nicotiana</i> spp. and <i>Tilia cordata</i> 0.1 – 5 mg/kg (public literature)</p>                          |
| Effects on earthworms                      | <p>Plant pathogenic viruses are generally considered to be pathogenic towards plant species only and not towards other organisms. Exposure to soil organisms is limited for glasshouse use.</p> <p>Nicotine:<br/> Exposure to soil organisms is limited for glasshouse use.</p>                                                                                                                                                                                                                                                                                                                           |
| Effects on non-target soil micro-organisms | <p>Plant pathogenic viruses are generally considered to be pathogenic towards plant species only and not towards other organisms. Exposure to soil</p>                                                                                                                                                                                                                                                                                                                                                                                                                                                    |

Additional studies

|                                                                        |
|------------------------------------------------------------------------|
| organisms is limited for glasshouse use.                               |
| Nicotine:<br>Exposure to soil organisms is limited for glasshouse use. |
| None submitted                                                         |

## Abbreviations

|                   |                                                                   |
|-------------------|-------------------------------------------------------------------|
| 1/ <i>n</i>       | slope of Freundlich isotherm                                      |
| $\lambda$         | wavelength                                                        |
| $\varepsilon$     | decadic molar extinction coefficient                              |
| a.s.              | active substance                                                  |
| AChE              | acetylcholinesterase                                              |
| ADE               | actual dermal exposure                                            |
| ADI               | acceptable daily intake                                           |
| AF                | assessment factor                                                 |
| AAOEL             | acute acceptable operator exposure level                          |
| AOEL              | acceptable operator exposure level                                |
| AP                | alkaline phosphatase                                              |
| AR                | applied radioactivity                                             |
| ARfD              | acute reference dose                                              |
| AST               | aspartate aminotransferase (SGOT)                                 |
| AUC               | area under the blood concentration/time curve                     |
| AV                | avoidance factor                                                  |
| BCF               | bioconcentration factor                                           |
| BUN               | blood urea nitrogen                                               |
| bw                | body weight                                                       |
| CAS               | Chemical Abstracts Service                                        |
| CFU               | colony-forming units                                              |
| ChE               | cholinesterase                                                    |
| CI                | confidence interval                                               |
| CIPAC             | Collaborative International Pesticides Analytical Council Limited |
| CL                | confidence limits                                                 |
| C <sub>max</sub>  | concentration achieved at peak blood level                        |
| DAA               | days after application                                            |
| DAT               | days after treatment                                              |
| DDD               | daily dietary dose                                                |
| DM                | dry matter                                                        |
| DT <sub>50</sub>  | period required for 50% dissipation (define method of estimation) |
| DT <sub>90</sub>  | period required for 90% dissipation (define method of estimation) |
| dw                | dry weight                                                        |
| EbC <sub>50</sub> | effective concentration (biomass)                                 |
| EC <sub>50</sub>  | effective concentration                                           |
| ECHA              | European Chemicals Agency                                         |
| EEC               | European Economic Community                                       |

|                       |                                                                                                                                                     |
|-----------------------|-----------------------------------------------------------------------------------------------------------------------------------------------------|
| EMDI                  | estimated maximum daily intake                                                                                                                      |
| ER <sub>50</sub>      | emergence rate/effective rate, median                                                                                                               |
| ErC <sub>50</sub>     | effective concentration (growth rate)                                                                                                               |
| ETR                   | exposure toxicity ratio                                                                                                                             |
| ETR <sub>acute</sub>  | exposure toxicity ratio for acute exposure                                                                                                          |
| ETR <sub>larvae</sub> | exposure toxicity ratio for chronic exposure                                                                                                        |
| ETR <sub>larvae</sub> | exposure toxicity ratio for larvae                                                                                                                  |
| ETR <sub>HPG</sub>    | exposure toxicity ratio for effects on honeybee hypopharygeal glands                                                                                |
| EU                    | European Union                                                                                                                                      |
| EUROPOEM              | European Predictive Operator Exposure Model                                                                                                         |
| f(twa)                | Time-weighted average factor                                                                                                                        |
| FAO                   | Food and Agriculture Organization of the United Nations                                                                                             |
| FID                   | flame ionisation detector                                                                                                                           |
| FIR                   | food intake rate                                                                                                                                    |
| FOB                   | functional observation battery                                                                                                                      |
| FOCUS                 | Forum for the Co-ordination of Pesticide Fate Models and their Use                                                                                  |
| GAP                   | Good Agricultural Practice                                                                                                                          |
| GC                    | gas chromatography                                                                                                                                  |
| GCPF                  | Global Crop Protection Federation (formerly known as International Group of National Associations of Manufacturers of Agrochemical Products; GIFAP) |
| GGT                   | gamma glutamyl transferase                                                                                                                          |
| GM                    | geometric mean                                                                                                                                      |
| GS                    | growth stage                                                                                                                                        |
| GSH                   | glutathione                                                                                                                                         |
| Hb                    | haemoglobin                                                                                                                                         |
| Hct                   | haematocrit                                                                                                                                         |
| HPLC                  | high-pressure liquid chromatography<br>or high-performance liquid chromatography                                                                    |
| HPLC-MS               | high-pressure liquid chromatography–mass spectrometry                                                                                               |
| HPG                   | hypopharygeal glands                                                                                                                                |
| HQ                    | hazard quotient                                                                                                                                     |
| HQ <sub>contact</sub> | hazard quotient for contact exposure                                                                                                                |
| HR                    | hazard rate                                                                                                                                         |
| IEDI                  | international estimated daily intake                                                                                                                |
| IESTI                 | international estimated short-term intake                                                                                                           |
| ISO                   | International Organization for Standardization                                                                                                      |
| IUPAC                 | International Union of Pure and Applied Chemistry                                                                                                   |
| iv                    | intravenous                                                                                                                                         |

|                   |                                                                                                                                                                                  |
|-------------------|----------------------------------------------------------------------------------------------------------------------------------------------------------------------------------|
| JMPR              | Joint Meeting of the FAO Panel of Experts on Pesticide Residues in Food and the Environment and the WHO Expert Group on Pesticide Residues (Joint Meeting on Pesticide Residues) |
| $K_{doc}$         | organic carbon linear adsorption coefficient                                                                                                                                     |
| $K_{Foc}$         | Freundlich organic carbon adsorption coefficient                                                                                                                                 |
| LC                | liquid chromatography                                                                                                                                                            |
| LC <sub>50</sub>  | lethal concentration, median                                                                                                                                                     |
| LC-MS             | liquid chromatography–mass spectrometry                                                                                                                                          |
| LC-MS-MS          | liquid chromatography with tandem mass spectrometry                                                                                                                              |
| LD <sub>50</sub>  | lethal dose, median; dosis letalis media                                                                                                                                         |
| LDD <sub>50</sub> | lethal dietary dose; median                                                                                                                                                      |
| LDH               | lactate dehydrogenase                                                                                                                                                            |
| LOAEL             | lowest observable adverse effect level                                                                                                                                           |
| LOD               | limit of detection                                                                                                                                                               |
| LOQ               | limit of quantification                                                                                                                                                          |
| M/L               | mixing and loading                                                                                                                                                               |
| MAF               | multiple application factor                                                                                                                                                      |
| MCH               | mean corpuscular haemoglobin                                                                                                                                                     |
| MCHC              | mean corpuscular haemoglobin concentration                                                                                                                                       |
| MCV               | mean corpuscular volume                                                                                                                                                          |
| mm                | millimetre (also used for mean measured concentrations)                                                                                                                          |
| mN                | milli-newton                                                                                                                                                                     |
| MRL               | maximum residue level                                                                                                                                                            |
| MS                | mass spectrometry                                                                                                                                                                |
| MSDS              | material safety data sheet                                                                                                                                                       |
| MTD               | maximum tolerated dose                                                                                                                                                           |
| MWHC              | maximum water-holding capacity                                                                                                                                                   |
| NESTI             | national estimated short-term intake                                                                                                                                             |
| NOAEC             | no observed adverse effect concentration                                                                                                                                         |
| NOAEL             | no observed adverse effect level                                                                                                                                                 |
| NOEC              | no observed effect concentration                                                                                                                                                 |
| NOEL              | no observed effect level                                                                                                                                                         |
| NPD               | nitrogen–phosphorus detector                                                                                                                                                     |
| OECD              | Organisation for Economic Co-operation and Development                                                                                                                           |
| OM                | organic matter content                                                                                                                                                           |
| Pa                | pascal                                                                                                                                                                           |
| PD                | proportion of different food types                                                                                                                                               |
| PEC               | predicted environmental concentration                                                                                                                                            |

|                     |                                                                  |
|---------------------|------------------------------------------------------------------|
| PEC <sub>air</sub>  | predicted environmental concentration in air                     |
| PEC <sub>gw</sub>   | predicted environmental concentration in groundwater             |
| PEC <sub>sed</sub>  | predicted environmental concentration in sediment                |
| PEC <sub>soil</sub> | predicted environmental concentration in soil                    |
| PEC <sub>sw</sub>   | predicted environmental concentration in surface water           |
| PHED                | pesticide handler's exposure data                                |
| PHI                 | pre-harvest interval                                             |
| PIE                 | potential inhalation exposure                                    |
| pK <sub>a</sub>     | negative logarithm (to the base 10) of the dissociation constant |
| P <sub>ow</sub>     | partition coefficient between <i>n</i> -octanol and water        |
| PPE                 | personal protective equipment                                    |
| ppm                 | parts per million (10 <sup>-6</sup> )                            |
| PT                  | proportion of diet obtained in the treated area                  |
| PTT                 | partial thromboplastin time                                      |
| QSAR                | quantitative structure–activity relationship                     |
| r <sup>2</sup>      | coefficient of determination                                     |
| RPE                 | respiratory protective equipment                                 |
| RUD                 | residue per unit dose                                            |
| SC                  | suspension concentrate                                           |
| SD                  | standard deviation                                               |
| SFO                 | single first-order                                               |
| SMILES              | simplified molecular-input line-entry system                     |
| SPG                 | specific protection goal                                         |
| SSD                 | species sensitivity distribution                                 |
| STMR                | supervised trials median residue                                 |
| t <sub>1/2</sub>    | half-life (define method of estimation)                          |
| TER                 | toxicity exposure ratio                                          |
| TER <sub>A</sub>    | toxicity exposure ratio for acute exposure                       |
| TER <sub>LT</sub>   | toxicity exposure ratio following chronic exposure               |
| TER <sub>ST</sub>   | toxicity exposure ratio following repeated exposure              |
| TK                  | technical concentrate                                            |
| TLV                 | threshold limit value                                            |
| Tmax                | time until peak blood levels achieved                            |
| TMDI                | theoretical maximum daily intake                                 |
| TRR                 | total radioactive residue                                        |
| TSH                 | thyroid-stimulating hormone (thyrotropin)                        |
| TWA                 | time-weighted average                                            |
| UDS                 | unscheduled DNA synthesis                                        |

|     |                           |
|-----|---------------------------|
| UF  | uncertainty factor        |
| UV  | ultraviolet               |
| W/S | water/sediment            |
| w/v | weight per unit volume    |
| w/w | weight per unit weight    |
| WBC | white blood cell          |
| WG  | water-dispersible granule |
| WHO | World Health Organization |
